# Supplementary material
Source: MDPI journal article supplement (https://www.mdpi.com/search?q=materials-12-03057)
Supplement: s001 [file materials-12-03057-s001.pdf]

Article

# Supplementary Materials: Compression after Impact Behaviour and Failure Analysis of Nanosilica Toughened Thin Epoxy/GFRP Composite Laminates

L. Prince Jeya Lal <sup>1</sup>, S. Ramesh <sup>2</sup>, S. Parasuraman <sup>3,\*</sup>, Elango Natarajan <sup>4</sup> and I. Elamvazuthi <sup>5,\*</sup>

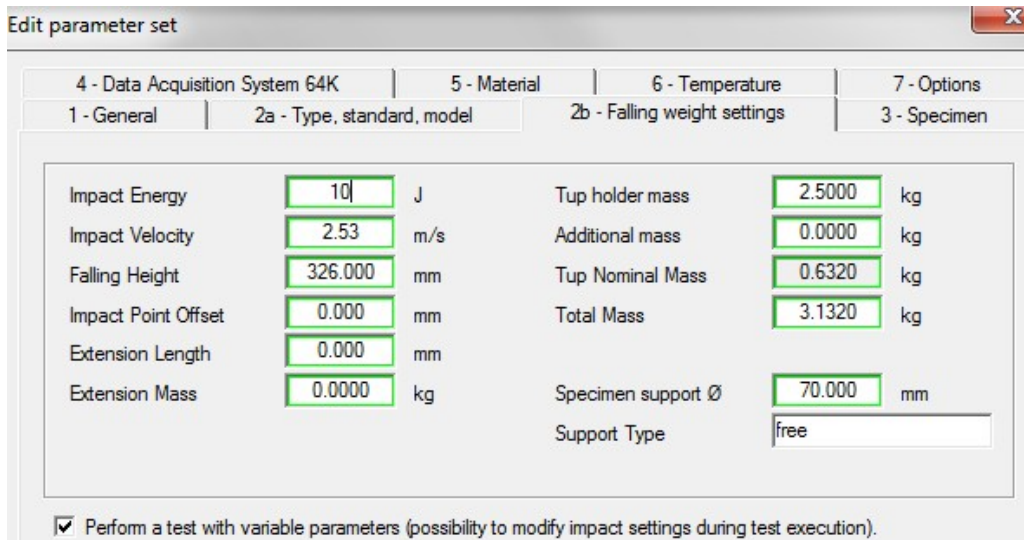

4 - Data Acquisition System 64K | 5 - Material | 6 - Temperature | 7 - Options  
 1 - General | 2a - Type, standard, model | 2b - Falling weight settings | 3 - Specimen

|                     |         |     |                    |        |    |
|---------------------|---------|-----|--------------------|--------|----|
| Impact Energy       | 10      | J   | Tup holder mass    | 2.5000 | kg |
| Impact Velocity     | 2.53    | m/s | Additional mass    | 0.0000 | kg |
| Falling Height      | 326.000 | mm  | Tup Nominal Mass   | 0.6320 | kg |
| Impact Point Offset | 0.000   | mm  | Total Mass         | 3.1320 | kg |
| Extension Length    | 0.000   | mm  | Specimen support Ø | 70.000 | mm |
| Extension Mass      | 0.0000  | kg  | Support Type       | free   |    |

Perform a test with variable parameters (possibility to modify impact settings during test execution).

(a)

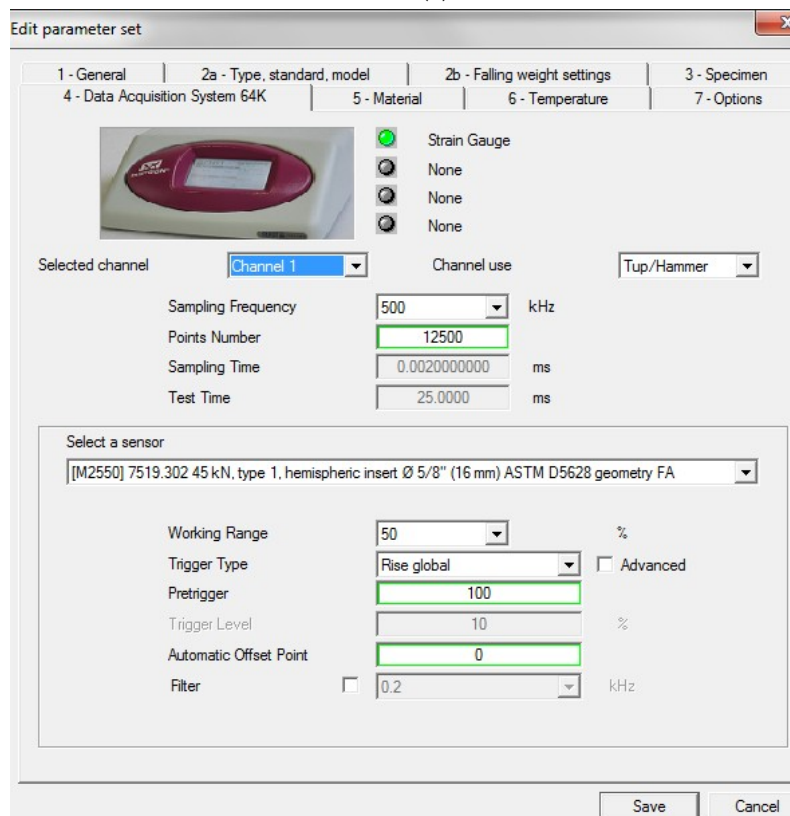

1 - General | 2a - Type, standard, model | 2b - Falling weight settings | 3 - Specimen  
 4 - Data Acquisition System 64K | 5 - Material | 6 - Temperature | 7 - Options



Strain Gauge  
 None  
 None  
 None

Selected channel: Channel 1 | Channel use: Tup/Hammer

Sampling Frequency: 500 kHz  
 Points Number: 12500  
 Sampling Time: 0.0020000000 ms  
 Test Time: 25.0000 ms

Select a sensor: [M2550] 7519.302 45 kN, type 1, hemispheric insert Ø 5/8" (16 mm) ASTM D5628 geometry FA

Working Range: 50 %  
 Trigger Type: Rise global  Advanced  
 Pretrigger: 100  
 Trigger Level: 10 %  
 Automatic Offset Point: 0  
 Filter:  0.2 kHz

Save | Cancel

(b)

**Figure S1.** (a) Low velocity impact test parameters (b) Data Acquisition System parameters.
